# Supplementary material for: Controlling gas/liquid exchange using microfluidics for real-time monitoring of flagellar length in living Chlamydomonas at the single-cell level
Source: Royal Society of Chemistry journal article supplement (doi:10.1039/c2lc40638a), 2012-01-01
Supplement: c2lc40638a.pdf [file c2lc40638a.pdf]

## Supplementary Information

### The conventional method of deflagellation, regeneration and flagellar length measurement

Deflagellation and flagellar assembly was essentially as described by Pan *et al.* The pH of *Chlamydomonas* cell culture was rapidly decreased to 4.5 by addition of 0.5 M acetic acid. After 30 s for flagella detachment, the pH was raised to 7.2–7.4 with a certain volume of 0.5 M KOH. After centrifugation, the sedimented cells were resuspended in a fresh M medium for flagellar regeneration. 200  $\mu$ L cell samples for flagellar length measurements were fixed in a final 1% glutaraldehyde solution at different stages and imaged using an inverted Olympus IX71 microscope with a 60 $\times$  objective (with 1.6 $\times$  magnification changer). Flagellar length results were graphed using GraphPad Prism version 5.0a.

#### M medium

Sodium Citrate (0.5 g), Ferric Chloride (0.03 g), Calcium Chloride (0.053 g), Magnesium Sulfate (0.3 g), Ammonium Nitrate (0.3 g), Potassium Phosphate (0.1 g), Dipotassium Phosphate (0.131 g),  $\text{H}_3\text{BO}_3$  (0.001 g),  $\text{ZnSO}_4 \cdot 7\text{H}_2\text{O}$  (0.001 g),  $\text{MnSO}_4 \cdot \text{H}_2\text{O}$  (0.000303 g),  $\text{CoCl}_2 \cdot 6\text{H}_2\text{O}$  (0.0002 g),  $\text{Na}_2\text{MoO}_4 \cdot 2\text{H}_2\text{O}$  (0.0002 g),  $\text{CuSO}_4 \cdot 5\text{H}_2\text{O}$  (0.0000625 g), add DI water to 1L.

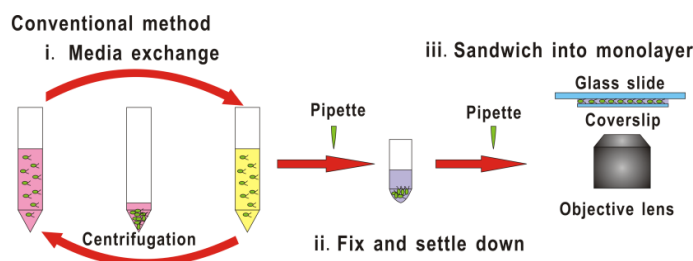

**Supplementary Fig. 1** Schematic illustration of the conventional method for analysis of *Chlamydomonas* flagella. This includes the following artificial steps: i) Exchange media by centrifugation for 3 min and circulate the process if washing is necessary. ii) Sampling by pipetting at certain intervals, and cell fixation. iii) Sandwich cells between a glass slide and a coverslip into monolayer for imaging under a microscope.

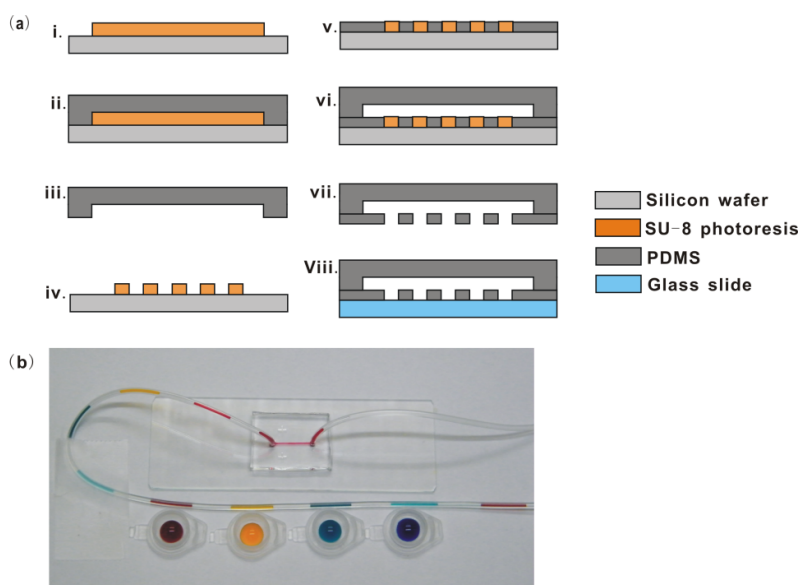

**Supplementary Fig. 2** (a) Flow diagram of fabrication procedure of the microfluidic device. (b) The photograph below showing the microdevice with pre-loading sequential gas-liquid plugs into a tubing for media isolation. The liquid plugs are filled with food dyes.

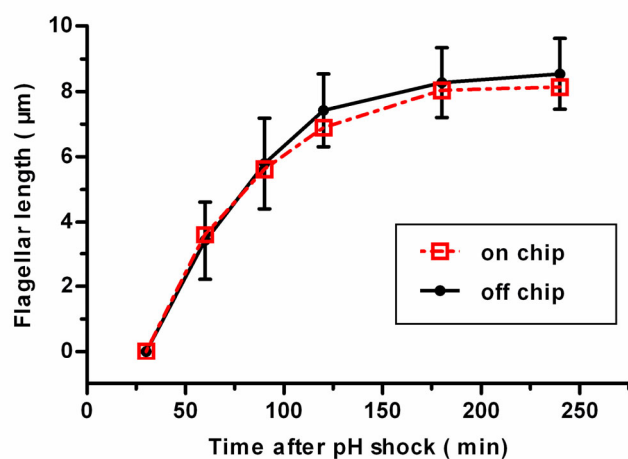

**Supplementary Fig. 3** On-chip and off-chip comparisons of flagellar regeneration after pH shock. At least 50 cells were measured for each time point. Red dashed line with square symbols presents results from the on-chip method. Black solid line with round symbols presents results from the traditional method, and error bars indicate SD. Flow rate: 0 ml/h.

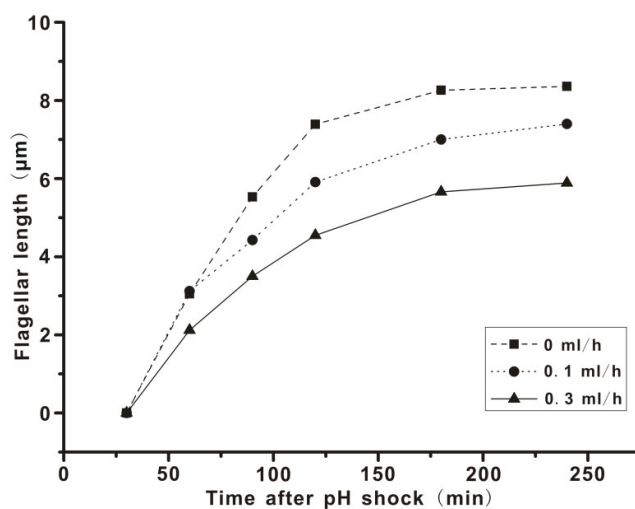

**Supplementary Fig. 4** On-chip flagellar regeneration *versus* flow rate. At least 50 cells were measured for each time point. Square symbols present static flow (0 ml/h), round symbols present 0.1 ml/h, and triangle symbols present 0.3 ml/h.

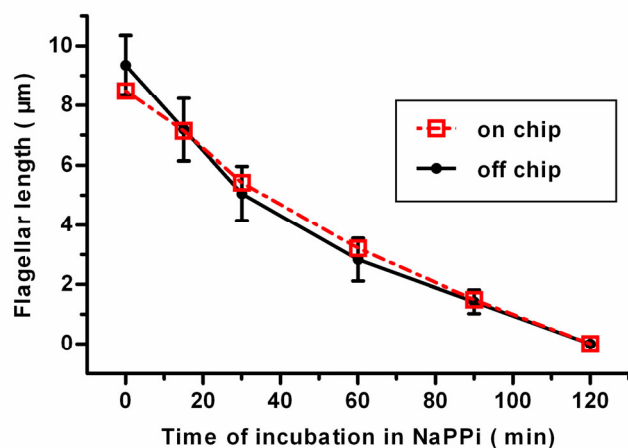

**Supplementary Fig. 5** On-chip and off-chip comparisons of flagellar disassembly during incubation in 20 mM NaPPi for 120 min. Red dashed line with square symbols presents results from the on-chip method. Black solid line with round symbols presents results from the traditional method, and error bars indicate SD. Flow rate: 0 ml/h.

#### Supplemental References

1. J. M. Pan and W. J. Snell, J. Biol. Chem., 2000, 275, 24106-24114.
